# Supplementary material for: Computational deconvolution of genome wide expression data from Parkinson's and Huntington's disease brain tissues using population-specific expression analysis
Source: Front Neurosci. 2015 Jan 9;8:441. doi: 10.3389/fnins.2014.00441 (PMC4288238; doi:10.3389/fnins.2014.00441)
Supplement: Supplementary file 8 [file Table8.XLSX]

## Sheet: Sheet1
Table S8.
David functional annotation clustering with differentially expressed genes in prefrontal cortex of Parkinson´s diseased (PD) brains (revealed by PSEA)
PD prefrontal cortex
NEURONS
Annotation Cluster 1	Enrichment Score: 3.1648121479115936
Category	Term	Count	PValue	Fold Enrichment	FDR
GOTERM_MF_FAT	GO:0005525~GTP binding	11/89	0.000204217	4.31355	0.267241
GOTERM_MF_FAT	GO:0019001~guanyl nucleotide binding	11/89	0.000252788	4.20063	0.330704
GOTERM_MF_FAT	GO:0032561~guanyl ribonucleotide binding	11/89	0.000252788	4.20063	0.330704
GOTERM_MF_FAT	GO:0032553~ribonucleotide binding	26/89	0.000365025	2.06579	0.477211
GOTERM_MF_FAT	GO:0032555~purine ribonucleotide binding	26/89	0.000365025	2.06579	0.477211
GOTERM_MF_FAT	GO:0017076~purine nucleotide binding	26/89	0.000709737	1.97747	0.925934
SP_PIR_KEYWORDS	gtp-binding	9/117	0.000862936	4.49731	1.08971
UP_SEQ_FEATURE	nucleotide phosphate-binding region:GTP	8/117	0.00216403	4.43007	2.99524
GOTERM_MF_FAT	GO:0003924~GTPase activity	6/89	0.0142593	4.14814	17.153
NEURONS
Annotation Cluster 2	Enrichment Score: 2.406776135950728
Category	Term	Count	PValue	Fold Enrichment	FDR
GOTERM_CC_FAT	GO:0005874~microtubule	9/90	0.000633984	4.66496	0.802259
GOTERM_BP_FAT	GO:0007017~microtubule-based process	8/94	0.00177903	4.55067	2.78577
SP_PIR_KEYWORDS	microtubule	7/117	0.0027838	4.98187	3.47621
GOTERM_CC_FAT	GO:0015630~microtubule cytoskeleton	11/90	0.00474835	2.84562	5.86627
GOTERM_BP_FAT	GO:0007018~microtubule-based movement	5/94	0.00762148	6.36792	11.4315
GOTERM_CC_FAT	GO:0044430~cytoskeletal part	13/90	0.0319052	1.93938	33.7571
NEURONS
Annotation Cluster 3	Enrichment Score: 2.3920148761932953
Category	Term	Count	PValue	Fold Enrichment	FDR
GOTERM_MF_FAT	GO:0000166~nucleotide binding	33/89	1.38706e-05	2.14429	0.0181722
SP_PIR_KEYWORDS	nucleotide-binding	26/117	1.97492e-05	2.53526	0.0250623
GOTERM_BP_FAT	GO:0006793~phosphorus metabolic process	20/94	2.8071e-05	2.95817	0.044531
GOTERM_BP_FAT	GO:0006796~phosphate metabolic process	20/94	2.8071e-05	2.95817	0.044531
GOTERM_BP_FAT	GO:0016310~phosphorylation	17/94	0.000100684	3.05819	0.159637
GOTERM_MF_FAT	GO:0032553~ribonucleotide binding	26/89	0.000365025	2.06579	0.477211
GOTERM_MF_FAT	GO:0032555~purine ribonucleotide binding	26/89	0.000365025	2.06579	0.477211
KEGG_PATHWAY	hsa04012:ErbB signaling pathway	6/39	0.000420236	8.99204	0.443624
GOTERM_MF_FAT	GO:0017076~purine nucleotide binding	26/89	0.000709737	1.97747	0.925934
SP_PIR_KEYWORDS	kinase	13/117	0.000918328	3.10643	1.15929
UP_SEQ_FEATURE	binding site:ATP	11/117	0.00171839	3.3154	2.38534
SP_PIR_KEYWORDS	serine/threonine-protein kinase	9/117	0.0021827	3.8835	2.73517
KEGG_PATHWAY	hsa04912:GnRH signaling pathway	5/39	0.00579567	6.65228	5.96319
SMART	SM00220:S_TKc	7/60	0.00646591	4.08964	6.54684
SP_PIR_KEYWORDS	phosphotransferase	6/117	0.00746286	4.90751	9.06929
INTERPRO	IPR002290:Serine/threonine protein kinase	7/112	0.00776204	4.02003	9.81564
UP_SEQ_FEATURE	domain:Protein kinase	9/117	0.0078346	3.13482	10.4533
GOTERM_MF_FAT	GO:0004674~protein serine/threonine kinase activity	9/89	0.00864275	3.05323	10.7503
INTERPRO	IPR008271:Serine/threonine protein kinase, active site	8/112	0.00950687	3.36138	11.8957
INTERPRO	IPR017442:Serine/threonine protein kinase-related	8/112	0.010218	3.31456	12.7307
SP_PIR_KEYWORDS	atp-binding	16/117	0.0135197	1.98373	15.8661
KEGG_PATHWAY	hsa04720:Long-term potentiation	4/39	0.0138168	7.66968	13.6853
UP_SEQ_FEATURE	nucleotide phosphate-binding region:ATP	13/117	0.0139081	2.20755	17.8484
GOTERM_BP_FAT	GO:0006468~protein amino acid phosphorylation	11/94	0.0160956	2.37341	22.6993
PANTHER_PATHWAY	P00053:T cell activation	5/25	0.0163869	4.76167	14.3915
UP_SEQ_FEATURE	active site:Proton acceptor	10/117	0.0188019	2.48266	23.39
KEGG_PATHWAY	hsa04664:Fc epsilon RI signaling pathway	4/39	0.0199305	6.68639	19.1803
BIOCARTA	h_fcer1Pathway:Fc Epsilon Receptor I Signaling in Mast Cells	3/12	0.0206219	11.975	19.0219
BIOCARTA	h_tcrPathway:T Cell Receptor Signaling Pathway	3/12	0.0261534	10.5662	23.5354
INTERPRO	IPR017441:Protein kinase, ATP binding site	8/112	0.0325125	2.61523	35.4822
PANTHER_PATHWAY	P00010:B cell activation	4/25	0.0327749	5.37788	26.9035
PANTHER_PATHWAY	P04393:Ras Pathway	4/25	0.0379306	5.07911	30.4868
GOTERM_BP_FAT	GO:0000165~MAPKKK cascade	5/94	0.0379819	3.91073	45.9037
INTERPRO	IPR000719:Protein kinase, core	8/112	0.039954	2.49985	41.7602
SP_PIR_KEYWORDS	transferase	15/117	0.0409824	1.76903	41.2041
PIR_SUPERFAMILY	PIRSF000564:kinase-related transforming protein	3/61	0.0452897	8.66042	38.4367
KEGG_PATHWAY	hsa04010:MAPK signaling pathway	6/39	0.0467251	2.92999	39.7199
NEURONS
Annotation Cluster 4	Enrichment Score: 2.1088881166580897
Category	Term	Count	PValue	Fold Enrichment	FDR
GOTERM_CC_FAT	GO:0005739~mitochondrion	22/90	1.3112e-05	2.87441	0.0166527
KEGG_PATHWAY	hsa05010:Alzheimer's disease	8/39	0.000166796	6.39924	0.176293
KEGG_PATHWAY	hsa05012:Parkinson's disease	7/39	0.00032237	7.13041	0.34047
SP_PIR_KEYWORDS	mitochondrion	15/117	0.000485637	2.96397	0.614614
GOTERM_BP_FAT	GO:0045333~cellular respiration	6/94	0.00053953	8.90195	0.852649
SP_PIR_KEYWORDS	respiratory chain	5/117	0.000893772	11.5776	1.12845
GOTERM_BP_FAT	GO:0006091~generation of precursor metabolites and energy	9/94	0.00139078	4.13813	2.18409
KEGG_PATHWAY	hsa05016:Huntington's disease	7/39	0.00194394	5.07051	2.03722
KEGG_PATHWAY	hsa00190:Oxidative phosphorylation	6/39	0.00257784	6.01775	2.69338
GOTERM_BP_FAT	GO:0015980~energy derivation by oxidation of organic compounds	6/94	0.00312845	5.99645	4.85014
GOTERM_BP_FAT	GO:0006119~oxidative phosphorylation	5/94	0.00462165	7.3426	7.08656
SP_PIR_KEYWORDS	nad	6/117	0.0057869	5.2191	7.1012
SP_PIR_KEYWORDS	mitochondrion inner membrane	6/117	0.0063125	5.11093	7.7226
GOTERM_BP_FAT	GO:0042775~mitochondrial ATP synthesis coupled electron transport	4/94	0.00670175	10.2796	10.12
GOTERM_BP_FAT	GO:0042773~ATP synthesis coupled electron transport	4/94	0.00670175	10.2796	10.12
GOTERM_BP_FAT	GO:0022900~electron transport chain	5/94	0.00785784	6.31206	11.7656
GOTERM_BP_FAT	GO:0022904~respiratory electron transport chain	4/94	0.00968404	8.99468	14.3076
GOTERM_CC_FAT	GO:0044455~mitochondrial membrane part	5/90	0.0112349	5.68089	13.3684
GOTERM_MF_FAT	GO:0022890~inorganic cation transmembrane transporter activity	5/89	0.0193017	4.83034	22.5369
GOTERM_CC_FAT	GO:0005743~mitochondrial inner membrane	7/90	0.0198453	3.24887	22.477
GOTERM_CC_FAT	GO:0031966~mitochondrial membrane	8/90	0.0198613	2.8837	22.493
GOTERM_CC_FAT	GO:0044429~mitochondrial part	10/90	0.0224384	2.38693	25.042
SP_PIR_KEYWORDS	electron transport	4/117	0.0226402	6.57607	25.2221
GOTERM_CC_FAT	GO:0005740~mitochondrial envelope	8/90	0.0266944	2.71164	29.0831
GOTERM_CC_FAT	GO:0019866~organelle inner membrane	7/90	0.0271363	3.02175	29.4909
GOTERM_CC_FAT	GO:0031967~organelle envelope	10/90	0.0283103	2.29068	30.564
GOTERM_CC_FAT	GO:0031975~envelope	10/90	0.028823	2.28332	31.0279
GOTERM_BP_FAT	GO:0006120~mitochondrial electron transport, NADH to ubiquinone	3/94	0.0336927	10.2796	41.9471
GOTERM_MF_FAT	GO:0003954~NADH dehydrogenase activity	3/89	0.034273	10.1774	36.6775
GOTERM_MF_FAT	GO:0008137~NADH dehydrogenase (ubiquinone) activity	3/89	0.034273	10.1774	36.6775
GOTERM_MF_FAT	GO:0050136~NADH dehydrogenase (quinone) activity	3/89	0.034273	10.1774	36.6775
GOTERM_CC_FAT	GO:0005747~mitochondrial respiratory chain complex I	3/90	0.0344744	10.1444	35.9556
GOTERM_CC_FAT	GO:0030964~NADH dehydrogenase complex	3/90	0.0344744	10.1444	35.9556
GOTERM_CC_FAT	GO:0045271~respiratory chain complex I	3/90	0.0344744	10.1444	35.9556
REACTOME_PATHWAY	REACT_1505:Integration of energy metabolism	6/30	0.0354144	3.1032	26.6375
GOTERM_CC_FAT	GO:0031090~organelle membrane	14/90	0.0395727	1.81415	40.1206
GOTERM_MF_FAT	GO:0051287~NAD or NADH binding	3/89	0.0403244	9.31126	41.6837
GOTERM_MF_FAT	GO:0016655~oxidoreductase activity, acting on NADH or NADPH, quinone or similar compound as acceptor	3/89	0.0434905	8.93121	44.1548
NEURONS
Annotation Cluster 5	Enrichment Score: 2.0377104598908713
Category	Term	Count	PValue	Fold Enrichment	FDR
GOTERM_BP_FAT	GO:0007017~microtubule-based process	8/94	0.00177903	4.55067	2.78577
UP_SEQ_FEATURE	nucleotide phosphate-binding region:GTP	8/117	0.00216403	4.43007	2.99524
SP_PIR_KEYWORDS	microtubule	7/117	0.0027838	4.98187	3.47621
INTERPRO	IPR018316:Tubulin/FtsZ, 2-layer sandwich domain	3/112	0.00931673	20.2829	11.6712
INTERPRO	IPR017975:Tubulin, conserved site	3/112	0.01016	19.401	12.6629
INTERPRO	IPR000217:Tubulin	3/112	0.0110358	18.5926	13.6819
INTERPRO	IPR003008:Tubulin/FtsZ, GTPase domain	3/112	0.0110358	18.5926	13.6819
PIR_SUPERFAMILY	PIRSF002306:tubulin	3/61	0.0134705	16.5335	13.2335
GOTERM_MF_FAT	GO:0003924~GTPase activity	6/89	0.0142593	4.14814	17.153
GOTERM_BP_FAT	GO:0034621~cellular macromolecular complex subunit organization	7/94	0.036331	2.82186	44.4117
GOTERM_BP_FAT	GO:0051258~protein polymerization	3/94	0.0446252	8.81112	51.5363
NEURONS
Annotation Cluster 6	Enrichment Score: 1.787932547825503
Category	Term	Count	PValue	Fold Enrichment	FDR
SP_PIR_KEYWORDS	ubl conjugation	11/117	0.00296148	3.07554	3.69427
UP_SEQ_FEATURE	cross-link:Glycyl lysine isopeptide (Lys-Gly) (interchain with G-Cter in ubiquitin)	5/117	0.0331506	4.1045	37.7017
SP_PIR_KEYWORDS	isopeptide bond	6/117	0.0440759	3.0922	43.5664
NEURONS
Annotation Cluster 7	Enrichment Score: 1.689410766909063
Category	Term	Count	PValue	Fold Enrichment	FDR
GOTERM_BP_FAT	GO:0000278~mitotic cell cycle	8/94	0.0137212	3.11167	19.6857
GOTERM_BP_FAT	GO:0022402~cell cycle process	10/94	0.0155169	2.54717	21.9747
GOTERM_BP_FAT	GO:0007049~cell cycle	11/94	0.0401394	2.04003	47.7969
OLIGODENDROCYTE
Annotation Cluster 1	Enrichment Score: 1.7339581824268224
Category	Term	Count	PValue	Fold Enrichment	FDR
SP_PIR_KEYWORDS	actin-binding	3/11	0.00690493	21.2385	6.51027
GOTERM_MF_FAT	GO:0003779~actin binding	3/10	0.020137	11.9475	18.615
GOTERM_MF_FAT	GO:0008092~cytoskeletal protein binding	3/10	0.0451826	7.72798	37.3844
MICROGLIA
Annotation Cluster 1	Enrichment Score: 2.0021877941262343
Category	Term	Count	PValue	Fold Enrichment	FDR
UP_SEQ_FEATURE	cross-link:Glycyl lysine isopeptide (Lys-Gly) (interchain with G-Cter in ubiquitin)	3/10	0.00370062	28.8136	3.2742
SP_PIR_KEYWORDS	isopeptide bond	3/10	0.00913917	18.0893	8.79046
SP_PIR_KEYWORDS	ubl conjugation	3/10	0.0291243	9.81378	25.6368
